# Supplementary material for: Defective Natriuretic Peptide Receptor Signaling in Skeletal Muscle Links Obesity to Type 2 Diabetes
Source: Oxford University Press journal article supplement (doi:10.2337/db15-0305), 2015-08-07

## SUPPLEMENTARY DATA

### **Supplementary Information for:**

### **Defective natriuretic peptide receptor signaling in skeletal muscle links obesity to type 2 diabetes**

Marine Coue, Pierre-Marie Badin, Isabelle K. Vila, Claire Laurens, Katie Louche, Marie-Adeline Marquès, Virginie Bourlier, Etienne Mouisel, Geneviève Tavernier, Arild C. Rustan, Jose E. Galgani, Denis R. Joannisse, Steven R. Smith, Dominique Langin, and Cedric Moro

### **Inventory of Supplemental Information:**

1. Supplemental Tables : 5
2. Supplemental Figures : 10

# SUPPLEMENTARY DATA

**Supplementary Table 1.** Clinical characteristics of the subjects.

|                                                  | Lean     | Obese                 | IGT/T2D                  |
|--------------------------------------------------|----------|-----------------------|--------------------------|
| Sex (male/female)                                | 6/3      | 5/4                   | 6/4                      |
| Age (yrs)                                        | 23.8±0.8 | 23.7±0.8              | 46.7±3.4 <sup>c,e</sup>  |
| Body weight (kg)                                 | 68.3±3.3 | 87.7±6.3 <sup>b</sup> | 103.3±4.1 <sup>c,d</sup> |
| BMI (kg/m <sup>2</sup> )                         | 22.5±0.5 | 32.9±0.5 <sup>c</sup> | 34.3±1.2 <sup>c</sup>    |
| Body fat (%)                                     | 19.7±2.5 | 27.9±2.1 <sup>a</sup> | 30.1±1.4 <sup>c</sup>    |
| GDR (mg.min <sup>-1</sup> .kg <sup>-1</sup> FFM) | 9.4±0.7  | 7.0±0.4 <sup>c</sup>  | 5.5±0.5 <sup>c,d</sup>   |

Data are Mean ± SEM. BMI: body mass index; GDR: glucose disposal rate; FFM: fat-free mass. <sup>a</sup>p<0.05, <sup>b</sup>p<0.01, <sup>c</sup>p<0.001 versus lean; <sup>d</sup>p<0.05, <sup>e</sup>p<0.01 versus obese.

# SUPPLEMENTARY DATA

**Supplementary Table 2.** Correlation between muscle NPRA protein expression and biological variables in humans.

| Variables        | Human muscle NPRA |         |              |
|------------------|-------------------|---------|--------------|
|                  | r                 | p value | p adj. value |
| Body weight (kg) | -0.46             | 0.06    | 0.06         |
| BMI              | -0.46             | 0.05    | 0.06         |
| HOMA-IR          | -0.48             | 0.04    | 0.06         |
| rQUICKI          | 0.63              | 0.005   | 0.025        |
| Fasting Insulin  | -0.52             | 0.03    | 0.07         |

BMI: body mass index; HOMA-IR: homeostasis model assessment of insulin resistance; revised QUICKI. r: Spearman correlation coefficients; non adjusted p value;  $p_{\text{adj.}}$  value: Benjamini-Hochberg false discovery rate considered statistically significant if  $\leq 5\%$ .

# SUPPLEMENTARY DATA

**Supplementary Table 3.** Correlation between log fasting plasma BNP and biological variables in db/+ and db/db mice.

| Variables       | Mouse Log [BNP] |          |              |
|-----------------|-----------------|----------|--------------|
|                 | r               | p value  | p adj. value |
| Body weight (g) | -0.69           | 0.0007   | 0.0008       |
| Fat Mass (%)    | -0.79           | < 0.0001 | 0.0002       |
| Fasting glucose | -0.76           | < 0.0001 | 0.0002       |
| Fasting insulin | -0.85           | < 0.0001 | 0.0007       |
| HbA1c           | -0.70           | 0.0006   | 0.0008       |
| Fructosamines   | -0.82           | < 0.0001 | 0.0003       |
| Muscle NPRC     | -0.59           | 0.02     | 0.02         |

r: Spearman correlation coefficients; non adjusted p value;  $p_{\text{adj.}}$  value: Benjamini-Hochberg false discovery rate considered statistically significant if  $\leq 5\%$ .

## SUPPLEMENTARY DATA

**Supplementary Table 4.** Correlation between muscle NPRC protein expression and biological variables in db/+ and db/db mice.

| Variables       | Mouse muscle NPRC |         |              |
|-----------------|-------------------|---------|--------------|
|                 | r                 | p value | p adj. value |
| Fasting glucose | 0.64              | 0.011   | 0.014        |
| Fasting insulin | 0.61              | 0.016   | 0.016        |
| HbA1c           | 0.65              | 0.009   | 0.036        |
| Fructosamines   | 0.65              | 0.012   | 0.024        |

HOMA-IR: homeostasis model assessment of insulin resistance. r: Spearman correlation coefficients; non adjusted p value;  $p_{\text{adj.}}$  value: Benjamini-Hochberg false discovery rate considered statistically significant if  $\leq 5\%$ .

# SUPPLEMENTARY DATA

**Supplementary Table 5.** List of mouse primer and probe sequences used for real-time qPCR  
Taqman chemistry:

| Gene symbol  | Taqman Probe ID |
|--------------|-----------------|
| UCP1         | Mm01244861_m1   |
| TFAM         | Mm00447485_m1   |
| GLUT1        | Mm00441480_m1   |
| GLUT2        | Mm00446229_m1   |
| GLUT4        | Mm00436615_m1   |
| CPT1 $\beta$ | Mm00487200_m1   |
| GYS1         | Mm00472712_m1   |
| PCK1         | Mm00440636_m1   |
| 18S          | Hs99999901_s1   |

## SYBR chemistry:

| Gene symbol   | Forward                  | Reverse                 |
|---------------|--------------------------|-------------------------|
| PPAR $\alpha$ | AGTTCACGCATGTGAAGGCTG    | TGTTCCGGTTCTTCTTCTGAATC |
| G6P           | ACACCGACTACTACAGCAACAG   | CCTCGAAAGATAGCAAGAGTAG  |
| PGC1 $\alpha$ | CTGTGTCACCACCCAAATCCTTAT | TGTGTCGAGAAAAGGACCTTGA  |

**Supplementary Figure S1. Correlation between muscle NPRA protein and clinical variables in humans**

Correlation between *vastus lateralis* NPRA protein expression, and (A) percent body fat (n=21), and (B) the McAuley insulin sensitivity index measured during an oral glucose tolerance test in human subjects with normal glucose tolerance (n=18).

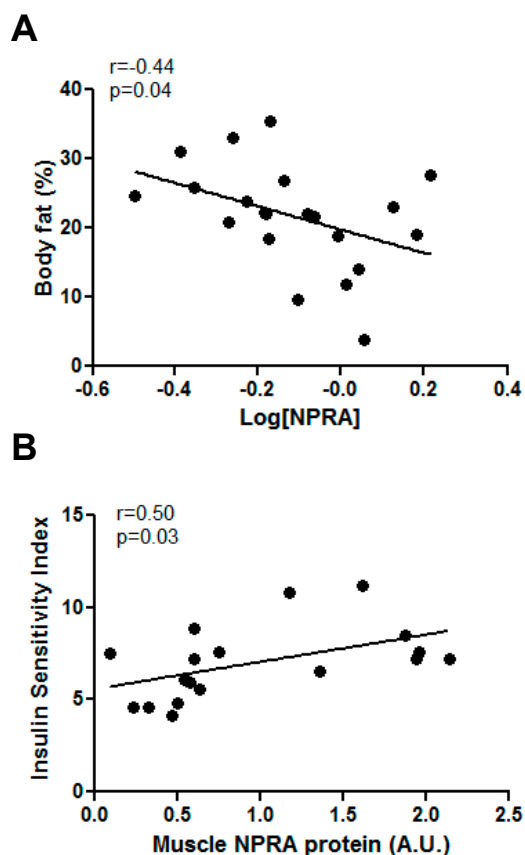

## SUPPLEMENTARY DATA

### Supplementary Figure S2. Acute effect of BNP injection on insulin sensitivity

Fasted C57BL/6 mice fed standard chow diet were injected intraperitoneously with saline (0.9% NaCl) or with BNP (1  $\mu$ g/kg) solution (arrow) and fasting blood glucose was measured (A) every 10 min in the basal state and (B) every 15 min during an i.p. GTT (n=11). (C) Tissue-specific glucose uptake was measured during a radiolabeled GTT with [2-<sup>3</sup>H]deoxyglucose (n=6).

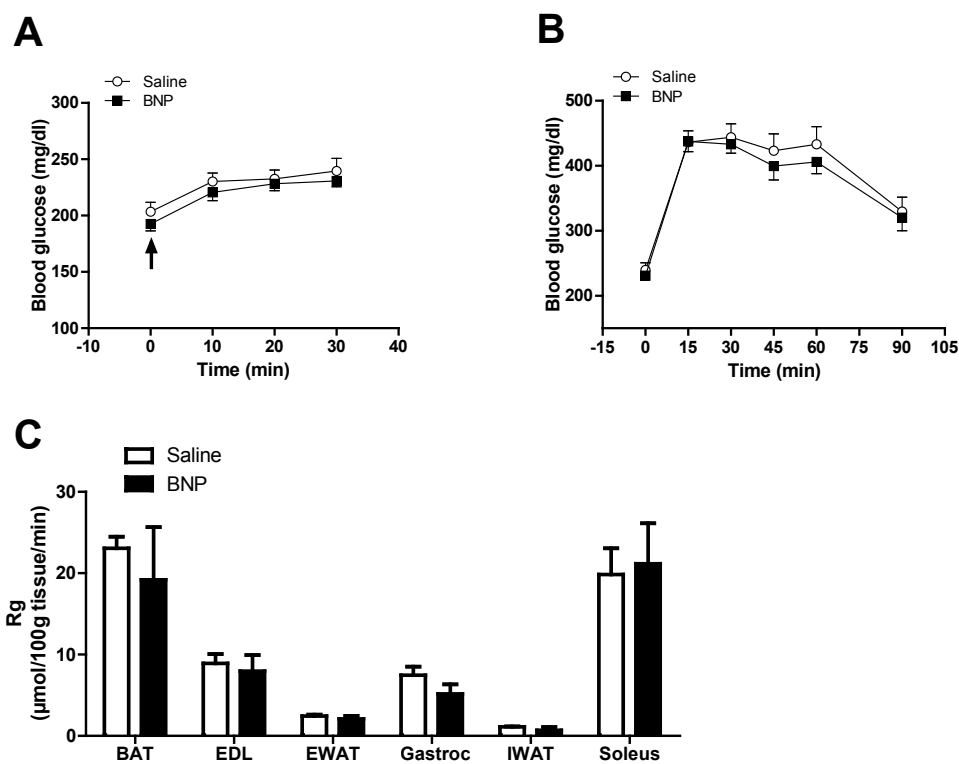



**Supplementary Figure S3. Effect of acute NP treatment on glucose uptake in human primary myotubes**

Glucose uptake was measured in presence of 1, 10 and 50  $\mu\text{M}$  of ANP or BNP, and 1  $\mu\text{M}$  of insulin in human primary myotubes. \*\*\*  $p < 0.001$  vs. saline ( $n=6$ ).

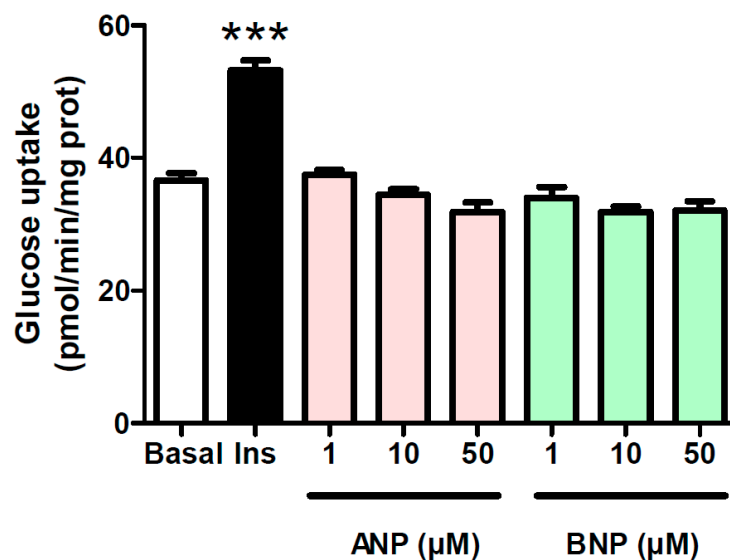

## SUPPLEMENTARY DATA

**Supplementary Figure S4.** Representative blots and quantitative bar graph of p38MAPK phosphorylation relative to total p38MAPK and  $\alpha$ -tubulin in *gastrocnemius* muscle of db/+ versus db/db mice. \*\*\* $p < 0.0001$  vs. db/+ (n=8).

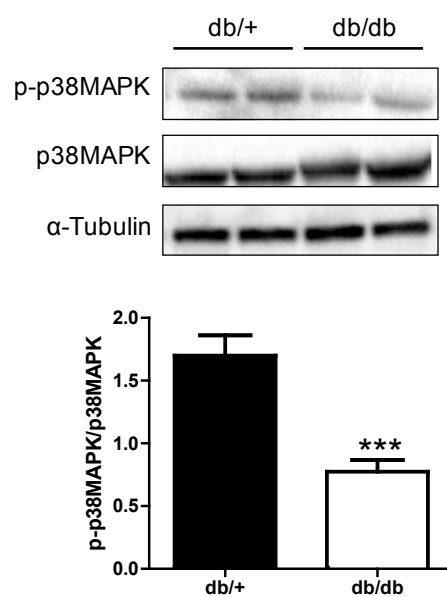

**Supplementary Figure S5. Chronic BNP treatment does not change lipid levels and gene expression in liver of db/db mice**

(A) Total ceramides, (B) total diacylglycerols levels, and (C) mRNA levels of genes involved in fat oxidation and glucose metabolism in liver of saline- and BNP-treated db/db mice.

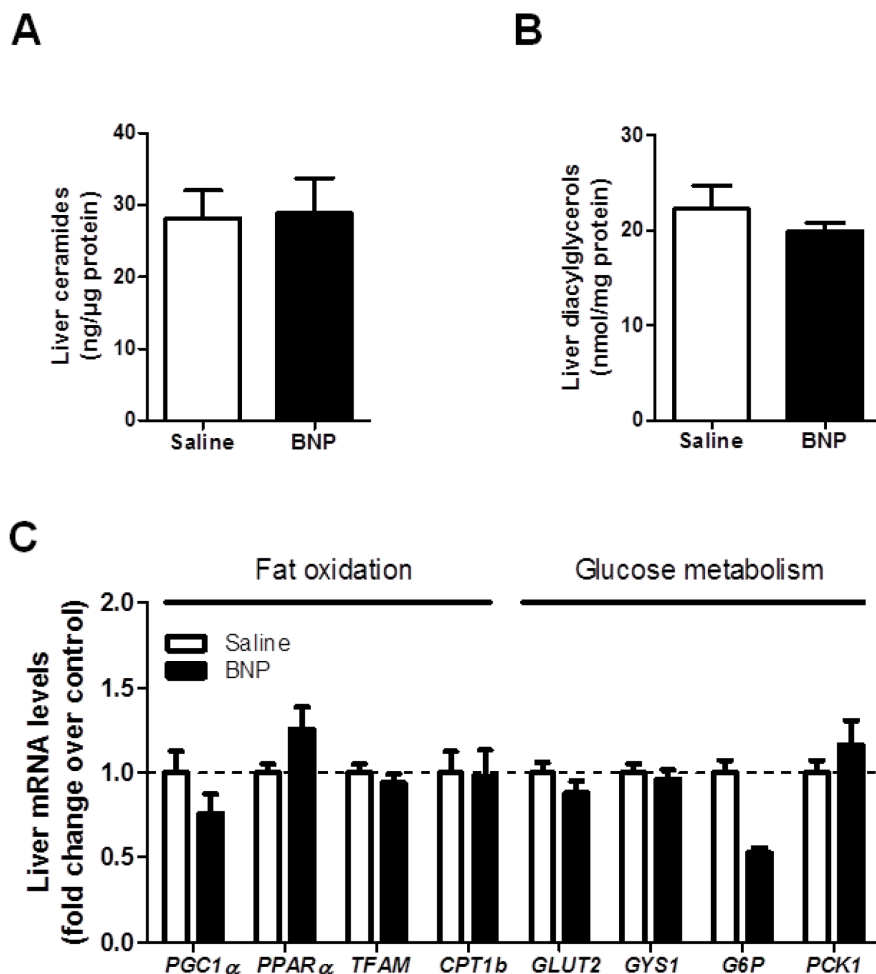

**Supplementary Figure S6. Chronic BNP treatment does not change lipid levels and gene expression in liver of HFD-fed mice**

(A) Total ceramides, (B) total diacylglycerols levels, and (C) mRNA levels of genes involved in fat oxidation and glucose metabolism in liver of saline- and BNP-treated HFD-fed mice.

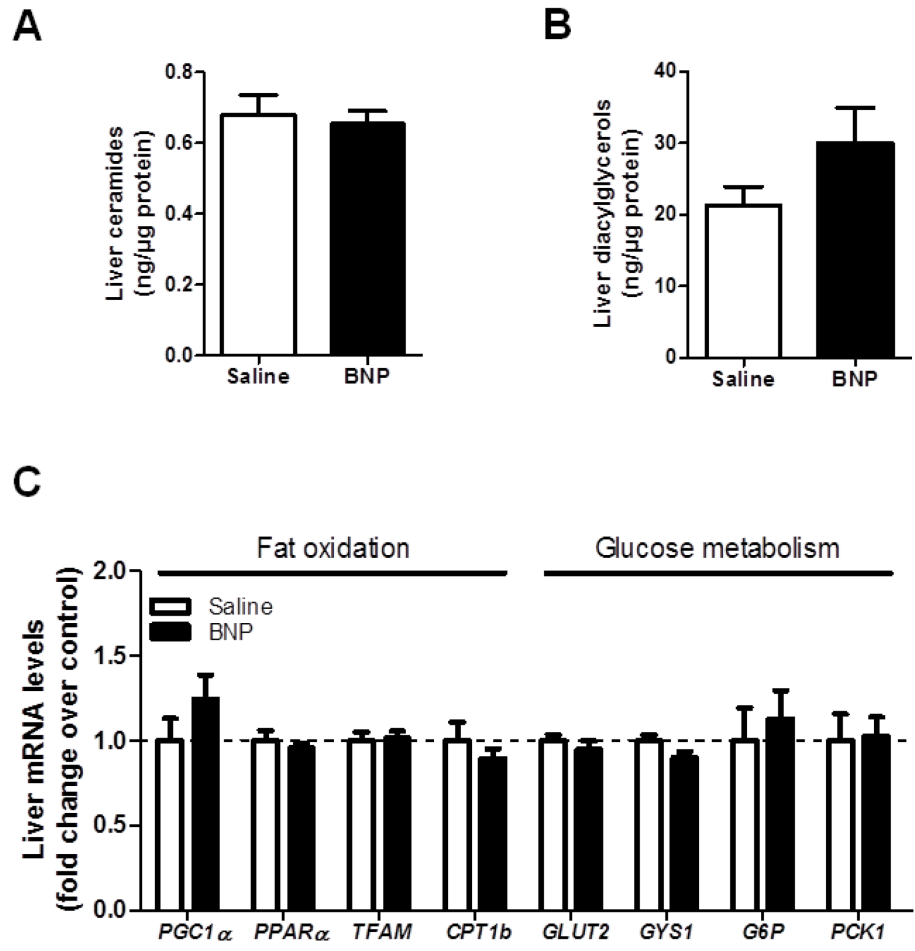

**Supplementary Figure S7. Expression of thermogenic and brown/beige gene markers in adipose tissues of db/db mice**

*PGC1 $\alpha$* , *UCP1*, *TFAM*, *GLUT1* and *GLUT4* mRNA levels in (A) BAT and (B) EWAT of db/db mice treated for 4 weeks with BNP (n=8-10).

**A**

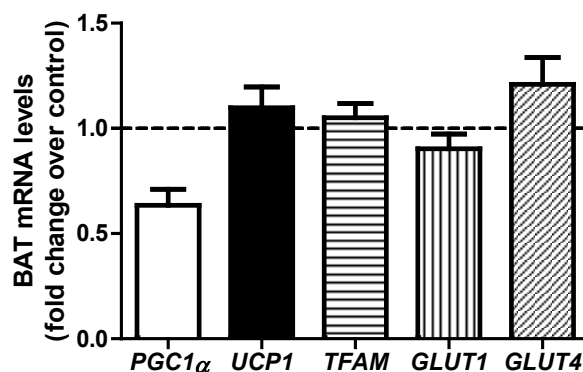

**B**

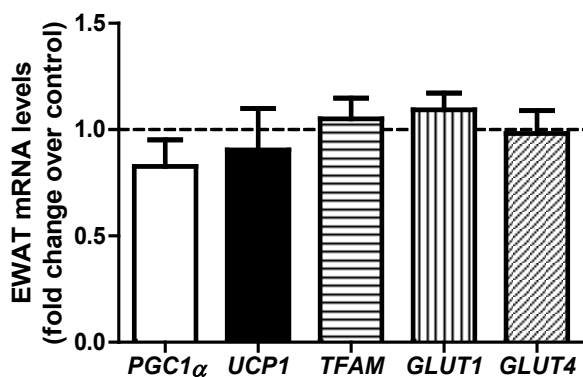

**Supplementary Figure S8. Expression of thermogenic and brown/beige gene markers in adipose tissues of HFD-fed mice**

**(A)** *PGC1 $\alpha$* , *UCP1*, *TFAM*, *GLUT1* and *GLUT4* mRNA levels in BAT and **(B)** *UCP1*, *GLUT1* and *GLUT4* gene expression in EWAT of HFD mice treated for 4 weeks with BNP (n=8-10).

**A**

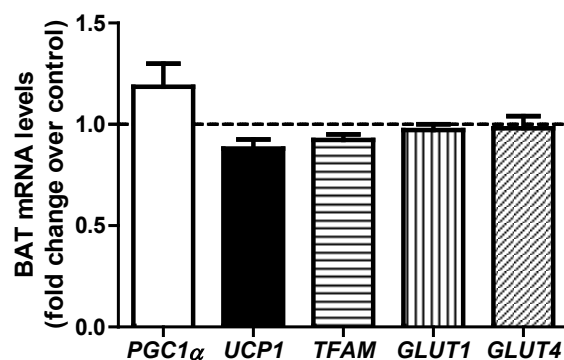

**B**

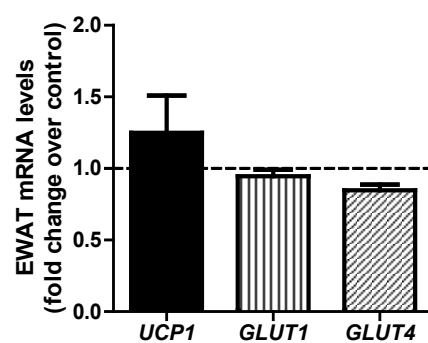

# **Supplementary Figure S9. Effect of acute BNP treatment on lipolysis in human primary myotubes**

Time-course of (A) fatty acid (FA) release and (B) FA oxidation from endogenous pre-labeled TAG pools in response to 1, 3 or 6 hours BNP treatment in the presence or absence of triacsin C to block FA recycling into TAG pools. (C) HSL Ser660 and (D) HSL Ser565 phosphorylation were measured after 10, 30 and 60 min acute stimulation with 100 nM of BNP in human primary myotubes (n=3-5).

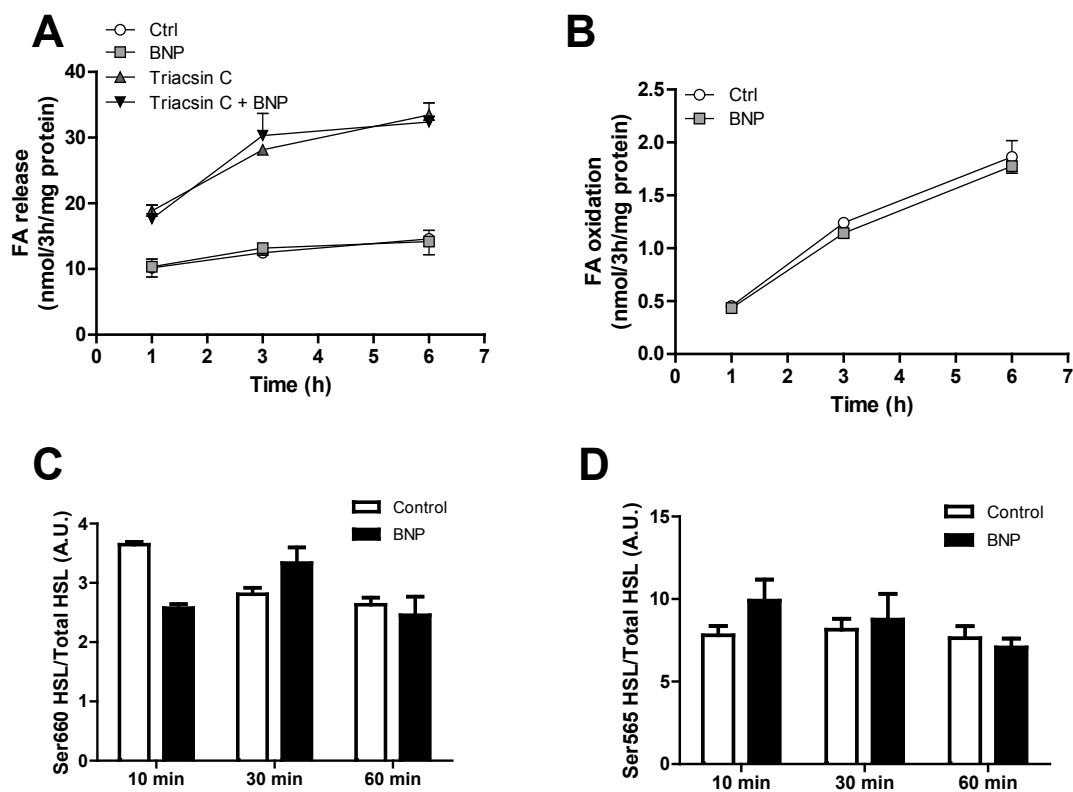

**Supplementary Figure S10. Effect of chronic NP treatment on basal ceramides content in human primary myotubes.**

Ceramide species content in human primary myotubes in basal condition (BSA) in control myotubes and in response to 3-days treatment with 100 nM of ANP or BNP (n=4).

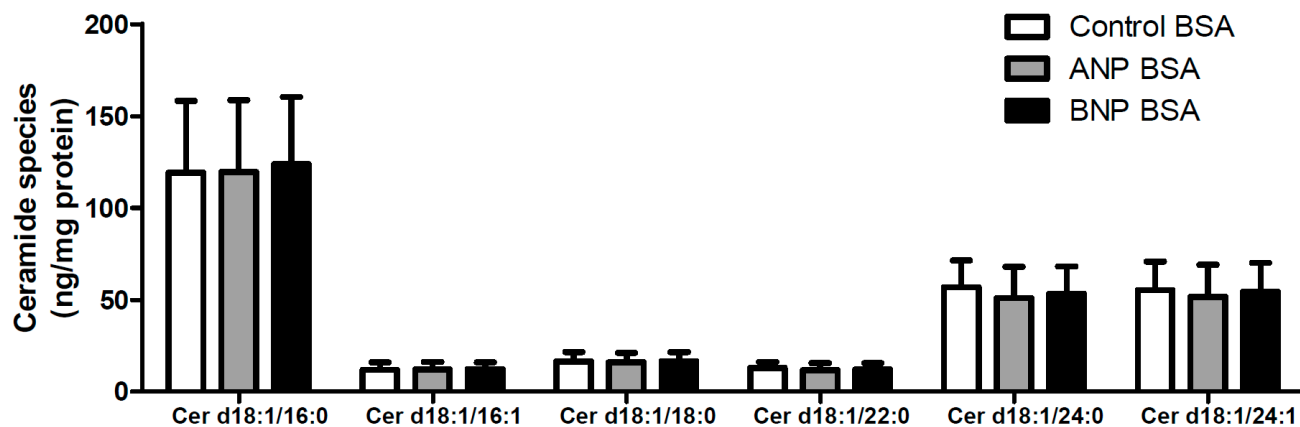

Supplement: db150305supplementarydata.pdf [file db150305supplementarydata.pdf]
